# Supplementary material for: Decoupling of the minority PhD talent pool and assistant professor hiring in medical school basic science departments in the US
Source: eLife. 2016 Nov 17;5:e21393. doi: 10.7554/eLife.21393 (PMC5153246; doi:10.7554/eLife.21393)
Supplement: Figure 1—source data 1. — DOI: http://dx.doi.org/10.7554/eLife.21393.003 [file elife-21393-fig1-data1.xlsx]

## Sheet: Sheet1
Year	Total Ph.D. Graduates1	Total Assistant Professors2	Total URM Ph.D. Graduates1,3	Total URM Assistant Professors2,3	Total WR PhD Graduates1,4	Total WR Assistant Professors2,4
1980	4082	3378	93	132	3989	3246
1981	4118	3345	110	129	4008	3216
1982	4216	3252	121	133	4095	3119
1983	4035	3141	102	130	3933	3011
1984	4224	3078	125	134	4099	2944
1985	4160	3087	144	137	4016	2950
1986	4174	3135	149	128	4025	3007
1987	4214	3095	152	124	4062	2971
1988	4524	3192	150	135	4374	3057
1989	4546	3316	157	156	4389	3160
1990	4777	3312	166	166	4611	3146
1991	5105	3324	199	177	4906	3147
1992	5331	3483	204	195	5127	3288
1993	5610	3609	224	206	5386	3403
1994	5767	3680	254	214	5513	3466
1995	5931	3765	289	219	5642	3546
1996	6297	3774	281	216	6016	3558
1997	6333	3831	299	211	6034	3620
1998	6424	3956	333	227	6091	3729
1999	6188	4096	356	240	5832	3856
2000	6517	4347	365	266	6152	4081
2001	6345	4606	368	295	5977	4311
2002	6376	4837	366	313	6010	4524
2003	6350	5105	347	330	6003	4775
2004	6716	5382	423	338	6293	5044
2005	7175	5469	472	347	6703	5122
2006	7466	5533	466	377	7000	5156
2007	8147	5616	550	363	7597	5253
2008	8726	5690	600	370	8126	5320
2009	8979	5758	655	374	8324	5384
2010	9069	5849	692	380	8377	5469
2011	9111	5773	748	374	8363	5399
2012	9518	5873	773	360	8745	5513
2013	9657	5862	868	347	8789	5515
2014		5903		341		5562
Notes:
1 Ph.D. attainment data from the National Science Foundation Survey of Earned Doctorates (SED), as compiled by the Federation of American Societies for Experimental Biology (FASEB)
2 Assistant professors in basic science departments, obtained from AAMC Faculty Roster
3 URM = underrepresented minority; that is, Ph.D. graduates or assistant professors who identify as African-American/Black, Hispanic/Latino, Native American or Alaska Native
4 WR = well-represented; that is, Ph.D. graduates or assistant professors who do not identify as belonging to an URM group (e.g. White, Asian or Pacific Islander, Other, Unknown, International)
