# Supplementary material for: Decoupling of the minority PhD talent pool and assistant professor hiring in medical school basic science departments in the US
Source: eLife. 2016 Nov 17;5:e21393. doi: 10.7554/eLife.21393 (PMC5153246; doi:10.7554/eLife.21393)
Supplement: Figure 2—source data 1. — DOI: http://dx.doi.org/10.7554/eLife.21393.005 [file elife-21393-fig2-data1.xlsx]

## Sheet: Sheet1
Year	Total Assistant Professors1	Assistant Professors Leaving2	Assistant Professors Hired3	Total URM Assistant Professors1,4	URM Assistant Professors Leaving2,4	URM Assistant Professors Hired3,4	Total URM Men Assistant Prof1,4	URM Men Leaving2,4	URM Men Hire3,4	Total URM Women Assistant Prof1,4	URM Women Leaving2,4	URM Women Hire3,4	Total WR Assistant Professors1,5	WR Assistant Professors Leaving2,5	WR Assistant Professors Hired3,5	Total WR Men Assistant Prof1,5	WR Men Asst Prof Leaving2,5	WR Men Assist Prof Hire3,5	Total WR Women Assistant Prof1,5	WR Women Assistant Prof Leaving2,5	WR Women Assistant Prof Hire3,5
1980	3378	563	530	132	22	19	93	15.5	16.5	39	6.5	2.5	3246	541	511	2498	416.333	359.333	748	124.667	151.667
1981	3345	556.4	463.4	129	21.4	25.4	94	15.7	18.7	35	5.7	6.7	3216	535	438	2441	404.933	337.933	775	130.067	100.067
1982	3252	533.15	422.15	133	22.4	19.4	97	16.45	15.45	36	5.95	3.95	3119	510.75	402.75	2374	388.183	271.183	745	122.567	131.567
1983	3141	496.15	433.15	130	21.4	25.4	96	16.1167	15.1167	34	5.28333	10.2833	3011	474.75	407.75	2257	349.183	268.183	754	125.567	139.567
1984	3078	464.65	473.65	134	23.4	26.4	95	15.6167	17.6167	39	7.78333	8.78333	2944	441.25	447.25	2176	308.683	288.683	768	132.567	158.567
1985	3087	473.65	521.65	137	26.4	17.4	97	17.6167	16.6167	40	8.78333	0.783333	2950	447.25	504.25	2156	288.683	324.683	794	158.567	179.567
1986	3135	611	571	128	13	9	96	14.5	9.5	32	-1.5	-0.5	3007	598	562	2192	452.333	397.333	815	145.667	164.667
1987	3095	516.4	613.4	124	17.4	28.4	91	10.7	16.7	33	6.7	11.7	2971	499	585	2137	349.933	390.933	834	149.067	194.067
1988	3192	630.15	754.15	135	33.4	54.4	97	22.45	37.45	38	10.95	16.95	3057	596.75	699.75	2178	429.183	489.183	879	167.567	210.567
1989	3316	620.15	616.15	156	42.4	52.4	112	31.1167	40.1167	44	11.2833	12.2833	3160	577.75	563.75	2238	409.183	397.183	922	168.567	166.567
1990	3312	460.65	472.65	166	33.4	44.4	121	24.6167	24.6167	45	8.78333	19.7833	3146	427.25	428.25	2226	296.683	234.683	920	130.567	193.567
1991	3324	485.65	644.65	177	37.4	55.4	121	17.6167	23.6167	56	19.7833	31.7833	3147	448.25	589.25	2164	226.683	316.683	983	221.567	272.567
1992	3483	770	896	195	31	42	127	20.5	30.5	68	10.5	11.5	3288	739	854	2254	542.333	620.333	1034	196.667	233.667
1993	3609	642.4	713.4	206	28.4	36.4	137	20.7	24.7	69	7.7	11.7	3403	614	677	2332	427.933	458.933	1071	186.067	218.067
1994	3680	701.15	786.15	214	41.4	46.4	141	26.45	32.45	73	14.95	13.95	3466	659.75	739.75	2363	460.183	502.183	1103	199.567	237.567
1995	3765	705.15	714.15	219	47.4	44.4	147	37.1167	31.1167	72	10.2833	13.2833	3546	657.75	669.75	2405	451.183	429.183	1141	206.567	240.567
1996	3774	469.65	526.65	216	30.4	25.4	141	18.6167	16.6167	75	11.7833	8.78333	3558	439.25	501.25	2383	274.683	301.683	1175	164.567	199.567
1997	3831	542.65	667.65	211	32.4	48.4	139	15.6167	18.6167	72	16.7833	29.7833	3620	510.25	619.25	2410	253.683	318.683	1210	256.567	300.567
1998	3956	895	1035	227	47	60	142	23.5	27.5	85	23.5	32.5	3729	848	975	2475	607.333	691.333	1254	240.667	283.667
1999	4096	782.4	1033.4	240	41.4	67.4	146	24.7	36.7	94	16.7	30.7	3856	741	966	2559	511.933	672.933	1297	229.067	293.067
2000	4347	952.15	1211.15	266	67.4	96.4	158	38.45	61.45	108	28.95	34.95	4081	884.75	1114.75	2720	621.183	749.183	1361	263.567	365.567
2001	4606	964.15	1195.15	295	76.4	94.4	181	60.1167	64.1167	114	16.2833	30.2833	4311	887.75	1100.75	2848	579.183	696.183	1463	308.567	404.567
2002	4837	700.65	968.65	313	48.4	65.4	185	22.6167	26.6167	128	25.7833	38.7833	4524	652.25	903.25	2965	391.683	527.683	1559	260.567	375.567
2003	5105	810.65	1087.65	330	49.4	57.4	189	19.6167	14.6167	141	29.7833	42.7833	4775	761.25	1030.25	3101	389.683	539.683	1674	371.567	490.567
2004	5382	1172	1259	338	55	64	184	18.5	21.5	154	36.5	42.5	5044	1117	1195	3251	757.333	771.333	1793	359.667	423.667
2005	5469	869.4	933.4	347	50.4	80.4	187	27.7	34.7	160	22.7	45.7	5122	819	853	3265	525.933	482.933	1857	293.067	370.067
2006	5533	1016.15	1099.15	377	97.4	83.4	194	45.45	45.45	183	51.95	37.95	5156	918.75	1015.75	3222	578.183	594.183	1934	340.567	421.567
2007	5616	1047.15	1121.15	363	62.4	69.4	194	60.1167	47.1167	169	2.28333	22.2833	5253	984.75	1051.75	3238	595.183	620.183	2015	389.567	431.567
2008	5690	774.65	842.65	370	55.4	59.4	181	9.61667	7.61667	189	45.7833	51.7833	5320	719.25	783.25	3263	416.683	468.683	2057	302.567	314.567
2009	5758	878.65	969.65	374	53.4	59.4	179	17.6167	27.6167	195	35.7833	31.7833	5384	825.25	910.25	3315	441.683	467.683	2069	383.567	442.567
2010	5849	1263	1187	380	61	55	189	28.5	22.5	191	32.5	32.5	5469	1202	1132	3341	783.333	735.333	2128	418.667	396.667
2011	5773	793.4	893.4	374	44.4	30.4	183	21.7	18.7	191	22.7	11.7	5399	749	863	3293	477.933	527.933	2106	271.067	335.067
2012	5873	1116.15	1105.15	360	83.4	70.4	180	42.45	37.45	180	40.95	32.95	5513	1032.75	1034.75	3343	628.183	593.183	2170	404.567	441.567
2013	5862	1036.15	1077.15	347	49.4	43.4	175	55.1167	51.1167	172	-5.71667	-7.71667	5515	986.75	1033.75	3308	560.183	553.183	2207	426.567	480.567
2014	5903	815.65		341	49.4		171	5.61667		170	43.7833		5562	766.25		3301	409.683		2261	356.567
Notes
1 Assistant professors in basic science departments, obtained from AAMC Faculty Roster
2 Number of assistant professors in basic science departments leaving the position (through promotion or contract termination). We assumed (i) the length of time that an individual occupied the position of assistant professor was six years based on traditional academic promotion cycles, and similarly, (ii) one-sixth of the assistant professors left their positions in 1980 (either to become associ…
3 Number of assistant professors in basic science departments hired. Calculated based on yearly changes in total population, and the imputed number leaving
4 URM = underrepresented minority; that is, assistant professors who identify as African-American/Black, Hispanic/Latino, Native American or Alaska Native
5 WR = well-represented; that is, assistant professors who do not identify as belonging to an URM group (e.g. White, Asian or Pacific Islander, Other, Unknown, International)
