# Supplementary material for: Decoupling of the minority PhD talent pool and assistant professor hiring in medical school basic science departments in the US
Source: eLife. 2016 Nov 17;5:e21393. doi: 10.7554/eLife.21393 (PMC5153246; doi:10.7554/eLife.21393)
Supplement: Figure 2—source data 2. — DOI: http://dx.doi.org/10.7554/eLife.21393.006 [file elife-21393-fig2-data2.xlsx]

## Sheet: Sheet1
Year	Total URM Ph.D. Graduates1,5	Pool of Potential Candidates: URM2,5	URM Assistant Professors Hired3,5	% of Pool Hired: URM4,5	Total URM Men Ph.D. Grad1,5	Pool of Potential Candidates: URM Men2,5	URM Men Hire3,5	% of Pool Hired: URM Men4,5	Total URM Women Ph.D. Grad1,5	Pool of Potential Candidates: URM Women2,5	URM Women Hire3,5	% of Pool Hired: URM Women4,5		Total WR PhD Graduates1,6	Pool of Potential Candidates: WR2,6	WR Assistant Professors Hired3,6	% of Pool Hired: WR4,6	Total WR Men Ph.D. Grad1,6	Pool of Potential Candidates: WR Men2,6	WR Men Hire3,6	% of Pool Hired: WR Men4,6	Total WR Women Ph.D. Grad1,6	Pool of Potential Candidates: WR Women2,6	WR Women Hire3,6	% of Pool Hired: WR Women4,6
1980	93		19		50		16.5		43		2.5			3989		511		2892		359.333		1097		151.667
1981	110		25.4		59		18.7		51		6.7			4008		438		2867		337.933		1141		100.067
1982	121		19.4		67		15.45		54		3.95			4095		402.75		2907		271.183		1188		131.567
1983	102		25.4		50		15.1167		52		10.2833			3933		407.75		2649		268.183		1284		139.567
1984	125	461.8	26.4	5.71676	70	230.233	17.6167	7.65166	55	231.567	8.78333	3.793		4099	18364.5	447.25	2.43541	2789	12867.4	288.683	2.24353	1310	5497.13	158.567	2.88453
1985	144	505.4	17.4	3.44282	76	255.117	16.6167	6.51336	68	250.283	0.783333	0.312979		4016	18455.2	504.25	2.73228	2683	12729	324.683	2.55073	1333	5726.23	179.567	3.13586
1986	149	552.4	9	1.62925	83	281.2	9.5	3.37838	66	271.2	-0.5	-0.184366		4025	18406	562	3.05335	2646	12521.3	397.333	3.17327	1379	5884.73	164.667	2.7982
1987	152	593.8	28.4	4.78276	89	309.15	16.7	5.40191	63	284.65	11.7	4.11031		4062	18213.8	585	3.21186	2623	12111.1	390.933	3.22789	1439	6102.63	194.067	3.18005
1988	150	638.8	54.4	8.51597	89	346.567	37.45	10.806	61	292.233	16.95	5.80016		4374	18477.5	699.75	3.78704	2736	12075.4	489.183	4.05108	1638	6402.13	210.567	3.28901
1989	157	642.8	52.4	8.15184	99	355.733	40.1167	11.2772	58	287.067	12.2833	4.27891		4389	18515	563.75	3.04483	2699	11784.9	397.183	3.37028	1690	6730.13	166.567	2.47494
1990	166	629.8	44.4	7.04986	93	349.233	24.6167	7.04877	73	280.567	19.7833	7.05121		4611	19050.5	428.25	2.24797	2859	11888.4	234.683	1.97406	1752	7162.13	193.567	2.70264
1991	199	644.4	55.4	8.59714	105	356.117	23.6167	6.63172	94	288.283	31.7833	11.025		4906	20065.2	589.25	2.93667	3019	12424	316.683	2.54896	1887	7641.23	272.567	3.56705
1992	204	669.4	42	6.27428	120	380.2	30.5	8.02209	84	289.2	11.5	3.97649		5127	21126	854	4.04241	3134	13009.3	620.333	4.7684	1993	8116.73	233.667	2.87883
1993	224	755.8	36.4	4.81609	120	418.15	24.7	5.90697	104	337.65	11.7	3.46513		5386	21983.8	677	3.07955	3199	13341.1	458.933	3.43999	2187	8642.63	218.067	2.52315
1994	254	868.8	46.4	5.3407	128	462.567	32.45	7.01521	126	406.233	13.95	3.43399		5513	22994.5	739.75	3.21707	3232	13812.4	502.183	3.63575	2281	9182.13	237.567	2.58727
1995	289	989.8	44.4	4.48575	179	540.733	31.1167	5.75453	110	449.067	13.2833	2.95799		5642	23714	669.75	2.82428	3250	13935.9	429.183	3.0797	2392	9778.13	240.567	2.46025
1996	281	1082.8	25.4	2.34577	151	579.233	16.6167	2.86873	130	503.567	8.78333	1.74422		6016	24743.5	501.25	2.02578	3431	14235.4	301.683	2.11925	2585	10508.1	199.567	1.89916
1997	299	1194.4	48.4	4.05224	157	630.117	18.6167	2.95448	142	564.283	29.7833	5.27808		6034	26003.2	619.25	2.38143	3401	14821	318.683	2.15021	2633	11182.2	300.567	2.68789
1998	333	1291.4	60	4.64612	156	672.2	27.5	4.09104	177	619.2	32.5	5.24871		6091	26766	975	3.64268	3405	15167.3	691.333	4.55806	2686	11598.7	283.667	2.44567
1999	356	1379.8	67.4	4.88477	182	731.15	36.7	5.01949	174	648.65	30.7	4.73291		5832	26849.8	966	3.5978	3283	15029.1	672.933	4.47753	2549	11820.6	293.067	2.47928
2000	365	1432.8	96.4	6.72808	161	707.567	61.45	8.68469	204	725.233	34.95	4.81914		6152	27063.5	1114.75	4.11902	3348	14883.4	749.183	5.0337	2804	12180.1	365.567	3.00134
2001	368	1448.8	94.4	6.51574	174	685.733	64.1167	9.35009	194	763.067	30.2833	3.96864		5977	26411	1100.75	4.16777	3253	14257.9	696.183	4.8828	2724	12153.1	404.567	3.32891
2002	366	1469.8	65.4	4.44958	148	631.233	26.6167	4.21661	218	838.567	38.7833	4.62496		6010	25905.5	903.25	3.48671	3285	13764.4	527.683	3.83369	2725	12141.1	375.567	3.09334
2003	347	1478.4	57.4	3.88258	161	637.117	14.6167	2.29419	186	841.283	42.7833	5.08548		6003	25889.2	1030.25	3.97945	3187	13710	539.683	3.93642	2816	12179.2	490.567	4.02789
2004	423	1555.4	64	4.1147	192	669.2	21.5	3.21279	231	886.2	42.5	4.79576		6293	26286	1195	4.54615	3286	13846.3	771.333	5.5707	3007	12439.7	423.667	3.40575
2005	472	1694.8	80.4	4.74392	201	749.15	34.7	4.63192	271	945.65	45.7	4.83265		6703	26756.8	853	3.18798	3361	13837.1	482.933	3.49013	3342	12919.6	370.067	2.86437
2006	466	1806.8	83.4	4.6159	215	819.567	45.45	5.54561	251	987.233	37.95	3.84408		7000	28027.5	1015.75	3.62412	3457	14254.4	594.183	4.16843	3543	13773.1	421.567	3.06079
2007	550	1972.8	69.4	3.51784	245	897.733	47.1167	5.2484	305	1075.07	22.2833	2.07274		7597	29502	1051.75	3.56501	3793	14695.9	620.183	4.22012	3804	14806.1	431.567	2.91478
2008	600	2213.8	59.4	2.68317	259	963.233	7.61667	0.79074	341	1250.57	51.7833	4.14079		8126	31603.5	783.25	2.47836	3955	15383.4	468.683	3.04669	4171	16220.1	314.567	1.93936
2009	655	2450.4	59.4	2.42409	271	1056.12	27.6167	2.61493	384	1394.28	31.7833	2.27955		8324	34046.2	910.25	2.67357	3926	16326	467.683	2.86465	4398	17720.2	442.567	2.49752
2010	692	2691.4	55	2.04355	274	1136.2	22.5	1.98029	418	1555.2	32.5	2.08976		8377	35663	1132	3.17416	3932	16912.3	735.333	4.34793	4445	18750.7	396.667	2.11547
2011	748	3001.8	30.4	1.01273	319	1263.15	18.7	1.48043	429	1738.65	11.7	0.672936		8363	36909.8	863	2.33814	3923	17237.1	527.933	3.06277	4440	19672.6	335.067	1.70321
2012	773	3263.8	70.4	2.15699	316	1362.57	37.45	2.74849	457	1901.23	32.95	1.73309		8745	38246.5	1034.75	2.70548	4003	17539.4	593.183	3.38201	4742	20707.1	441.567	2.13244
2013	868	3520.8	43.4	1.23267	356	1429.73	51.1167	3.57526	512	2091.07	-7.71667	-0.36903		8789	38658	1033.75	2.67409	4071	17530.9	553.183	3.15548	4718	21127.1	480.567	2.27464
Notes
1 Ph.D. attainment data from the National Science Foundation Survey of Earned Doctorates (SED), as compiled by the Federation of American Societies for Experimental Biology (FASEB)
2 Total number of Ph.D. graduates in the preceding five years, and minus the total number of assistant professors hired in the preceding four years
3 Number of assistant professors in basic science departments hired. Calculated based on yearly changes in total population, and the imputed number leaving
4 Number of assistant professors in basic science departments hired divided by the potential pool of candidates
5 URM = underrepresented minority; that is, Ph.D. graduates or assistant professors who identify as African-American/Black, Hispanic/Latino, Native American or Alaska Native
6 WR = well-represented; that is, Ph.D. graduates or assistant professors who do not identify as belonging to an URM group (e.g. White, Asian or Pacific Islander, Other, Unknown, International)
