# Supplementary material for: Decoupling of the minority PhD talent pool and assistant professor hiring in medical school basic science departments in the US
Source: eLife. 2016 Nov 17;5:e21393. doi: 10.7554/eLife.21393 (PMC5153246; doi:10.7554/eLife.21393)
Supplement: Figure 5—source data 1. — DOI: http://dx.doi.org/10.7554/eLife.21393.011 [file elife-21393-fig5-data1.xlsx]

## Sheet: Sheet1
		Transition Rate2
Year	% URM Ph.D. Students1	0	0.0025	0.005	0.01	0.05	0.1	0.2	0.25	0.3	0.4	0.5
1980	0.026712	0.0390764	0.0390764	0.0390764	0.0390764	0.0390764	0.0390764	0.0390764	0.0390764	0.0390764	0.0390764	0.0390764
1981	0.0236355	0.038565	0.038565	0.038565	0.038565	0.038565	0.038565	0.038565	0.038565	0.038565	0.038565	0.038565
1982	0.0247671	0.0407962	0.0408587	0.0409212	0.0410462	0.0420448	0.0432901	0.0457711	0.0470068	0.0482393	0.0506947	0.0531375
1983	0.0259812	0.0441127	0.0442202	0.0443276	0.0445424	0.0462552	0.0483826	0.052593	0.0546763	0.0567453	0.0608412	0.0648822
1984	0.0272837	0.047353	0.0475079	0.0476627	0.0479721	0.0504365	0.053491	0.059515	0.0624854	0.0654288	0.0712359	0.0769399
1985	0.0286806	0.0505199	0.0507247	0.0509294	0.0513385	0.0545946	0.0586241	0.0665513	0.0704505	0.0743079	0.0819004	0.0893347
1986	0.0301786	0.0536157	0.0538732	0.0541306	0.0546448	0.0587355	0.0637913	0.0737163	0.0785883	0.0834015	0.0928568	0.102091
1987	0.0317845	0.0569688	0.057279	0.057589	0.0582083	0.0631317	0.0692097	0.0811188	0.0869538	0.0927118	0.104003	0.115007
1988	0.0335058	0.0573013	0.0576045	0.0579075	0.0585128	0.0633221	0.0692526	0.0808528	0.0865272	0.0921208	0.103074	0.113728
1989	0.0339672	0.0573013	0.0576274	0.0579532	0.058604	0.0637707	0.0701314	0.0825406	0.0885956	0.094555	0.106198	0.11749
1990	0.0345075	0.0573013	0.057652	0.0580024	0.0587021	0.0642522	0.071073	0.0843428	0.0908006	0.0971458	0.109513	0.121472
1991	0.035124	0.0573013	0.0576745	0.0580474	0.058792	0.0646957	0.0719448	0.0860259	0.0928672	0.0995814	0.112646	0.12525
1992	0.0358152	0.0573013	0.0576949	0.0580881	0.0588732	0.0650963	0.0727326	0.0875498	0.0947405	0.101792	0.115497	0.128697
1993	0.0365802	0.0573013	0.0577129	0.0581241	0.0589452	0.0654511	0.0734306	0.0889008	0.0964022	0.103754	0.118031	0.131765
1994	0.0374194	0.0573013	0.0577284	0.0581551	0.0590071	0.065757	0.0740328	0.090068	0.0978388	0.105452	0.120226	0.134428
1995	0.0383333	0.0573013	0.0577413	0.0581808	0.0590584	0.0660104	0.0745324	0.0910394	0.099036	0.106869	0.122063	0.136662
1996	0.039323	0.0573013	0.0577512	0.0582007	0.0590981	0.0662072	0.0749218	0.0918016	0.0999784	0.107987	0.123522	0.138444
1997	0.0403901	0.0573013	0.0577619	0.0582221	0.0591408	0.0664161	0.0753293	0.0925804	0.100932	0.109109	0.124962	0.140182
1998	0.0427223	0.0573013	0.0577734	0.058245	0.0591864	0.0666395	0.0757644	0.0934072	0.10194	0.110291	0.126468	0.141988
1999	0.0452181	0.0573013	0.0577893	0.0582768	0.0592498	0.0669495	0.0763679	0.0945525	0.103336	0.111924	0.128544	0.144465
2000	0.0478877	0.0573013	0.057807	0.0583121	0.0593203	0.0672922	0.0770302	0.0957934	0.10484	0.113675	0.130746	0.147071
2001	0.0507424	0.0573013	0.0578282	0.0583544	0.0594045	0.0676989	0.0778102	0.0972354	0.106576	0.115685	0.13325	0.150005
2002	0.0537937	0.0573013	0.0578536	0.0584051	0.0595053	0.0681831	0.0787335	0.0989241	0.1086	0.118018	0.13613	0.153355
2003	0.0570535	0.0573013	0.0578835	0.0584646	0.0596237	0.0687498	0.0798092	0.100876	0.110931	0.120694	0.139413	0.157152
2004	0.0605345	0.0573013	0.0579179	0.0585332	0.05976	0.0694002	0.0810394	0.103093	0.11357	0.123716	0.143101	0.161396
2005	0.0614567	0.0573013	0.0579669	0.0586309	0.0599542	0.0703244	0.0827825	0.106219	0.117284	0.127961	0.148263	0.167318
2006	0.0625371	0.0573013	0.0580215	0.0587403	0.0601738	0.0713908	0.084787	0.109794	0.121521	0.132792	0.154114	0.174007
2007	0.0637699	0.0573013	0.0580741	0.0588453	0.0603827	0.0724422	0.0867946	0.113439	0.125863	0.137763	0.160167	0.18095
2008	0.0651514	0.0573013	0.0581244	0.0589457	0.0605826	0.0734121	0.088682	0.116928	0.130048	0.142582	0.166085	0.18778
2009	0.0666792	0.0573013	0.0581706	0.0590379	0.0607662	0.0742966	0.0903947	0.120135	0.13392	0.147064	0.171643	0.19424
2010	0.0683528	0.0573013	0.0582109	0.0591182	0.060926	0.0750703	0.0919004	0.122988	0.137384	0.151097	0.17669	0.200155
2011	0.0701724	0.0573013	0.0582441	0.0591845	0.0610584	0.0757185	0.0931729	0.125435	0.140374	0.1546	0.181125	0.205401
2012	0.0721395	0.0573013	0.0582683	0.0592332	0.061157	0.0762263	0.0941864	0.127431	0.14284	0.157514	0.184872	0.20989
2013	0.0742563	0.0573013	0.0582929	0.0592824	0.0612548	0.0767233	0.0951468	0.129264	0.145085	0.160158	0.188259	0.213947
2014	0.0765257	0.0573013	0.0583198	0.0593359	0.0613613	0.0772394	0.0961364	0.131085	0.147289	0.162725	0.191502	0.217801
2015	0.0789515	0.0573013	0.0583489	0.0593939	0.0614768	0.0777915	0.0971765	0.132963	0.149538	0.165321	0.194734	0.221745
2016	0.0815378	0.0573013	0.0583797	0.0594554	0.0615989	0.0783728	0.0982709	0.134923	0.151871	0.167998	0.198029	0.22581
2017	0.0842893	0.0573013	0.0584121	0.05952	0.0617273	0.0789838	0.0994203	0.136974	0.154305	0.17078	0.201559	0.230179
2018	0.0872114	0.0573013	0.0584461	0.0595878	0.0618621	0.0796248	0.100625	0.13912	0.156847	0.173794	0.205448	0.234791
2019	0.0903094	0.0573013	0.0584818	0.059659	0.0620035	0.0802966	0.101887	0.141362	0.159605	0.176999	0.209604	0.239792
2020	0.0935898	0.0573013	0.0585192	0.0597336	0.0621517	0.081	0.103207	0.143796	0.16254	0.180504	0.214143	0.245274
2021	0.0970598	0.0573013	0.0585584	0.0598117	0.062307	0.0817359	0.104586	0.146494	0.165752	0.184385	0.219138	0.251147
2022	0.100724	0.0573013	0.0585995	0.0598936	0.0624695	0.0825056	0.106084	0.149386	0.169312	0.188534	0.224631	0.257494
2023	0.104591	0.0573013	0.0586442	0.0599827	0.0626465	0.0833425	0.107746	0.152553	0.173264	0.19305	0.230509	0.264195
2024	0.108669	0.0573013	0.058692	0.0600779	0.0628356	0.0842726	0.109532	0.156051	0.177633	0.197881	0.236678	0.271344
2025	0.112963	0.0573013	0.0587446	0.0601827	0.0630435	0.0852738	0.111494	0.159912	0.182326	0.203114	0.243245	0.278814
2026	0.117485	0.0573013	0.0588032	0.0602996	0.0632756	0.0863756	0.113668	0.164065	0.187392	0.208665	0.250107	0.286526
2027	0.122239	0.0573013	0.0588665	0.0604256	0.0635257	0.0875997	0.116078	0.168452	0.19274	0.214474	0.2572	0.294437
2028	0.127235	0.0573013	0.058936	0.0605641	0.0638007	0.0889605	0.118683	0.173152	0.198311	0.220662	0.264493	0.302535
2029	0.132481	0.0573013	0.0590114	0.0607142	0.0640985	0.0904359	0.12145	0.178099	0.20407	0.227141	0.271979	0.310822
2030	0.137986	0.0573013	0.0590941	0.0608791	0.0644255	0.0920082	0.124431	0.18325	0.21001	0.23386	0.279664	0.319309
2031	0.143757	0.0573013	0.0591833	0.0610566	0.0647777	0.0937076	0.127585	0.188586	0.216134	0.240794	0.287561	0.328009
2032	0.149803	0.0573013	0.0592781	0.0612455	0.0651522	0.0955121	0.130888	0.194106	0.222453	0.247936	0.295683	0.336933
2033	0.156132	0.0573013	0.0593808	0.0614499	0.0655574	0.0974086	0.134329	0.199815	0.228983	0.255291	0.304041	0.34609
2034	0.162753	0.0573013	0.0594902	0.0616677	0.0659888	0.0993921	0.137909	0.205726	0.235737	0.262869	0.312645	0.355487
2035	0.169672	0.0573013	0.0596057	0.0618975	0.066444	0.101463	0.141632	0.211851	0.242729	0.270682	0.321504	0.365129
2036	0.176897	0.0573013	0.0597271	0.0621391	0.0669222	0.103626	0.14551	0.218204	0.249971	0.27874	0.330622	0.375016
2037	0.184436	0.0573013	0.0598546	0.0623927	0.0674238	0.105887	0.149552	0.224797	0.257472	0.287053	0.340004	0.385148
2038	0.192294	0.0573013	0.0599885	0.062659	0.0679502	0.108255	0.15377	0.23164	0.265242	0.29563	0.34965	0.395522
2039	0.200478	0.0573013	0.0601294	0.0629389	0.0685034	0.110737	0.158176	0.238744	0.273287	0.304476	0.35956	0.406133
2040	0.208993	0.0573013	0.0602777	0.0632337	0.0690853	0.113341	0.162781	0.246117	0.281613	0.313596	0.369732	0.416975
2041	0.217843	0.0573013	0.0604341	0.0635444	0.0696983	0.116076	0.167595	0.253767	0.290225	0.322991	0.380161	0.428039
2042	0.227032	0.0573013	0.0605993	0.0638723	0.0703449	0.11895	0.172628	0.2617	0.299124	0.332665	0.390843	0.439316
2043	0.236563	0.0573013	0.0607738	0.0642188	0.0710274	0.121971	0.177891	0.269922	0.308314	0.342614	0.401769	0.450794
2044	0.246437	0.0573013	0.0609584	0.0645851	0.0717485	0.125148	0.183392	0.278436	0.317794	0.352838	0.412932	0.462461
2045	0.256655	0.0573013	0.0611539	0.0649727	0.0725109	0.128488	0.189142	0.287245	0.327564	0.363333	0.424321	0.474302
2046	0.267217	0.0573013	0.0613609	0.065383	0.0733171	0.132001	0.195148	0.296352	0.337621	0.374092	0.435925	0.486303
2047	0.27812	0.0573013	0.0615802	0.0658175	0.0741702	0.135694	0.201419	0.305758	0.347961	0.38511	0.447731	0.498447
2048	0.289359	0.0573013	0.0618127	0.0662779	0.075073	0.139576	0.207962	0.315461	0.358581	0.396378	0.459725	0.510718
2049	0.300931	0.0573013	0.0620591	0.0667657	0.0760287	0.143655	0.214787	0.32546	0.369474	0.407887	0.471892	0.523096
2050	0.312829	0.0573013	0.0623205	0.0672827	0.0770406	0.147941	0.221898	0.335752	0.380632	0.419624	0.484215	0.535563
2051	0.325045	0.0573013	0.0625977	0.0678308	0.0781119	0.152443	0.229304	0.346333	0.392046	0.431579	0.496678	0.548099
2052	0.337569	0.0573013	0.0628918	0.0684119	0.0792464	0.157168	0.237009	0.357197	0.403705	0.443736	0.509261	0.560685
2053	0.350386	0.0573013	0.0632039	0.0690281	0.0804478	0.162126	0.245018	0.368337	0.415599	0.456082	0.521946	0.573299
2054	0.363488	0.0573013	0.0635351	0.0696815	0.08172	0.167326	0.253338	0.379746	0.427714	0.468599	0.534712	0.585921
2055	0.376857	0.0573013	0.0638866	0.0703745	0.0830672	0.172776	0.26197	0.391412	0.440036	0.481269	0.547539	0.598531
2056	0.390477	0.0573013	0.0642596	0.0711094	0.0844937	0.178485	0.270918	0.403325	0.452548	0.494076	0.560406	0.611105
2057	0.404329	0.0573013	0.0646556	0.0718889	0.0860042	0.184462	0.280183	0.415472	0.465234	0.506999	0.573292	0.623625
2058	0.418394	0.0573013	0.0650761	0.0727156	0.0876035	0.190715	0.289766	0.42784	0.478076	0.520017	0.586175	0.63607
2059	0.432648	0.0573013	0.0655224	0.0735924	0.0892967	0.197252	0.299667	0.440412	0.491055	0.53311	0.599033	0.648419
2060	0.447072	0.0573013	0.0659962	0.0745224	0.0910889	0.204081	0.309884	0.453172	0.504151	0.546256	0.611845	0.660653
2061	0.461637	0.0573013	0.0664993	0.0755088	0.0929859	0.211209	0.320413	0.466103	0.517343	0.559434	0.624589	0.672753
2062	0.476323	0.0573013	0.0670336	0.076555	0.0949935	0.218643	0.331251	0.479185	0.530609	0.57262	0.637244	0.6847
2063	0.491098	0.0573013	0.0676008	0.0776645	0.0971177	0.226389	0.342392	0.492398	0.543926	0.585793	0.649791	0.696478
2064	0.505941	0.0573013	0.0682032	0.0788412	0.0993649	0.234454	0.353828	0.505721	0.557274	0.59893	0.662208	0.708069
2065	0.520822	0.0573013	0.0688429	0.0800891	0.101742	0.242842	0.365551	0.519133	0.570628	0.612007	0.674477	0.71946
2066	0.535711	0.0573013	0.0695221	0.0814123	0.104255	0.251556	0.37755	0.532611	0.583965	0.625005	0.686579	0.730635
2067	0.550583	0.0573013	0.0702435	0.0828153	0.106913	0.260601	0.389814	0.546131	0.597263	0.6379	0.698497	0.741582
2068	0.565407	0.0573013	0.0710095	0.0843028	0.109721	0.269978	0.40233	0.559671	0.610498	0.650671	0.710215	0.752288
2069	0.580157	0.0573013	0.0718229	0.0858797	0.112689	0.279689	0.415082	0.573207	0.623649	0.6633	0.721718	0.762743
2070	0.594807	0.0573013	0.0726867	0.0875512	0.115824	0.289733	0.428054	0.586715	0.636692	0.675765	0.732992	0.772939
2071	0.609327	0.0573013	0.073604	0.0893228	0.119134	0.300109	0.441228	0.600172	0.649607	0.688049	0.744024	0.782866
2072	0.623694	0.0573013	0.074578	0.0912	0.122629	0.310814	0.454586	0.613554	0.662373	0.700134	0.754802	0.792519
2073	0.637882	0.0573013	0.0756123	0.093189	0.126316	0.321844	0.468107	0.626838	0.67497	0.712003	0.765317	0.801891
2074	0.651868	0.0573013	0.0767104	0.095296	0.130206	0.333192	0.481769	0.640002	0.687379	0.723643	0.77556	0.810979
2075	0.665629	0.0573013	0.0778762	0.0975275	0.134306	0.344852	0.495549	0.653025	0.699584	0.735038	0.785523	0.819779
2076	0.679145	0.0573013	0.0791139	0.0998905	0.138627	0.356814	0.509426	0.665885	0.711566	0.746177	0.7952	0.828289
2077	0.692396	0.0573013	0.0804278	0.102392	0.143179	0.369068	0.523373	0.678563	0.723312	0.757049	0.804586	0.836508
2078	0.705366	0.0573013	0.0818224	0.10504	0.14797	0.381602	0.537366	0.69104	0.734807	0.767643	0.813678	0.844437
2079	0.718038	0.0573013	0.0833026	0.107841	0.153012	0.3944	0.55138	0.703298	0.746039	0.777952	0.822473	0.852077
2080	0.730399	0.0573013	0.0848733	0.110804	0.158313	0.407449	0.56539	0.715322	0.756996	0.787969	0.830969	0.859429
Notes
1 Model output. The percentage of Ph.Ds. Awarded to scientists from URM backgrounds (underrepresented minority; that is, Ph.D. graduates who identify as African-American/Black, Hispanic/Latino, Native American or Alaska Native). This is modeled to grow exponentially from 1980-2080, an assumption which matches actual data from 1980-2013 (see Figure 4Bi).
2 Model output. The percentage of URM assistant professors given the following "transition rates" of "URM other aspire" Ph.D. gradutes onto the market of candidates pursuing assistant professor positions. Model assumptions specified in materials and methods
