# Supplementary material for: Decoupling of the minority PhD talent pool and assistant professor hiring in medical school basic science departments in the US
Source: eLife. 2016 Nov 17;5:e21393. doi: 10.7554/eLife.21393 (PMC5153246; doi:10.7554/eLife.21393)
Supplement: Figure 5—source data 2. — DOI: http://dx.doi.org/10.7554/eLife.21393.012 [file elife-21393-fig5-data2.xlsx]

## Sheet: Sheet1
		Transition Rate2
Year	% URM Ph.D. Students1	0	0.0025	0.005	0.01	0.05	0.1	0.2	0.25	0.3	0.4	0.5
1980	0.026712	0.0390764	0.0390764	0.0390764	0.0390764	0.0390764	0.0390764	0.0390764	0.0390764	0.0390764	0.0390764	0.0390764
1981	0.0236355	0.038565	0.038565	0.038565	0.038565	0.038565	0.038565	0.038565	0.038565	0.038565	0.038565	0.038565
1982	0.0247671	0.0407962	0.0408587	0.0409212	0.0410462	0.0420448	0.0432901	0.0457711	0.0470068	0.0482393	0.0506947	0.0531375
1983	0.0259812	0.0441127	0.0442202	0.0443276	0.0445424	0.0462552	0.0483826	0.052593	0.0546763	0.0567453	0.0608412	0.0648822
1984	0.0272837	0.047353	0.0475079	0.0476627	0.0479721	0.0504365	0.053491	0.059515	0.0624854	0.0654288	0.0712359	0.0769399
1985	0.0286806	0.0505199	0.0507247	0.0509294	0.0513385	0.0545946	0.0586241	0.0665513	0.0704505	0.0743079	0.0819004	0.0893347
1986	0.0301786	0.0536157	0.0538732	0.0541306	0.0546448	0.0587355	0.0637913	0.0737163	0.0785883	0.0834015	0.0928568	0.102091
1987	0.0317845	0.0569688	0.057279	0.057589	0.0582083	0.0631317	0.0692097	0.0811188	0.0869538	0.0927118	0.104003	0.115007
1988	0.0335058	0.0573013	0.0576045	0.0579075	0.0585128	0.0633221	0.0692526	0.0808528	0.0865272	0.0921208	0.103074	0.113728
1989	0.0339672	0.0573013	0.0576274	0.0579532	0.058604	0.0637707	0.0701314	0.0825406	0.0885956	0.094555	0.106198	0.11749
1990	0.0345075	0.0573013	0.057652	0.0580024	0.0587021	0.0642522	0.071073	0.0843428	0.0908006	0.0971458	0.109513	0.121472
1991	0.035124	0.0573013	0.0576745	0.0580474	0.058792	0.0646957	0.0719448	0.0860259	0.0928672	0.0995814	0.112646	0.12525
1992	0.0358152	0.0573013	0.0576949	0.0580881	0.0588732	0.0650963	0.0727326	0.0875498	0.0947405	0.101792	0.115497	0.128697
1993	0.0365802	0.0573013	0.0577129	0.0581241	0.0589452	0.0654511	0.0734306	0.0889008	0.0964022	0.103754	0.118031	0.131765
1994	0.0374194	0.0573013	0.0577284	0.0581551	0.0590071	0.065757	0.0740328	0.090068	0.0978388	0.105452	0.120226	0.134428
1995	0.0383333	0.0573013	0.0577413	0.0581808	0.0590584	0.0660104	0.0745324	0.0910394	0.099036	0.106869	0.122063	0.136662
1996	0.039323	0.0573013	0.0577512	0.0582007	0.0590981	0.0662072	0.0749218	0.0918016	0.0999784	0.107987	0.123522	0.138444
1997	0.0403901	0.0573013	0.0577619	0.0582221	0.0591408	0.0664161	0.0753293	0.0925804	0.100932	0.109109	0.124962	0.140182
1998	0.0427223	0.0573013	0.0577734	0.058245	0.0591864	0.0666395	0.0757644	0.0934072	0.10194	0.110291	0.126468	0.141988
1999	0.0452181	0.0573013	0.0577893	0.0582768	0.0592498	0.0669495	0.0763679	0.0945525	0.103336	0.111924	0.128544	0.144465
2000	0.0478877	0.0573013	0.057807	0.0583121	0.0593203	0.0672922	0.0770302	0.0957934	0.10484	0.113675	0.130746	0.147071
2001	0.0507424	0.0573013	0.0578282	0.0583544	0.0594045	0.0676989	0.0778102	0.0972354	0.106576	0.115685	0.13325	0.150005
2002	0.0537937	0.0573013	0.0578536	0.0584051	0.0595053	0.0681831	0.0787335	0.0989241	0.1086	0.118018	0.13613	0.153355
2003	0.0570535	0.0573013	0.0578835	0.0584646	0.0596237	0.0687498	0.0798092	0.100876	0.110931	0.120694	0.139413	0.157152
2004	0.0605345	0.0573013	0.0579179	0.0585332	0.05976	0.0694002	0.0810394	0.103093	0.11357	0.123716	0.143101	0.161396
2005	0.0614567	0.0573013	0.0579669	0.0586309	0.0599542	0.0703244	0.0827825	0.106219	0.117284	0.127961	0.148263	0.167318
2006	0.0625371	0.0573013	0.0580215	0.0587403	0.0601738	0.0713908	0.084787	0.109794	0.121521	0.132792	0.154114	0.174007
2007	0.0637699	0.0573013	0.0580741	0.0588453	0.0603827	0.0724422	0.0867946	0.113439	0.125863	0.137763	0.160167	0.18095
2008	0.0651514	0.0573013	0.0581244	0.0589457	0.0605826	0.0734121	0.088682	0.116928	0.130048	0.142582	0.166085	0.18778
2009	0.0666792	0.0573013	0.0581706	0.0590379	0.0607662	0.0742966	0.0903947	0.120135	0.13392	0.147064	0.171643	0.19424
2010	0.0683528	0.0573013	0.0582109	0.0591182	0.060926	0.0750703	0.0919004	0.122988	0.137384	0.151097	0.17669	0.200155
2011	0.0701724	0.0573013	0.0582441	0.0591845	0.0610584	0.0757185	0.0931729	0.125435	0.140374	0.1546	0.181125	0.205401
2012	0.0721395	0.0573013	0.0582683	0.0592332	0.061157	0.0762263	0.0941864	0.127431	0.14284	0.157514	0.184872	0.20989
2013	0.0742563	0.0573013	0.0582929	0.0592824	0.0612548	0.0767233	0.0951468	0.129264	0.145085	0.160158	0.188259	0.213947
2014	0.0765257	0.0573013	0.0583198	0.0593359	0.0613613	0.0772394	0.0961364	0.131085	0.147289	0.162725	0.191502	0.217801
2015	0.0789515	0.0573013	0.0583489	0.0593939	0.0614768	0.0777915	0.0971765	0.132963	0.149538	0.165321	0.194734	0.221745
2016	0.0815378	0.0573013	0.0583797	0.0594554	0.0615989	0.0783728	0.0982709	0.134923	0.151871	0.167998	0.198029	0.22581
2017	0.0842893	0.0573013	0.0584134	0.0595226	0.0617325	0.0790087	0.0994671	0.137058	0.154404	0.170893	0.201706	0.230364
2018	0.0872114	0.0573013	0.0584498	0.0595952	0.0618767	0.079694	0.100754	0.139347	0.157114	0.173982	0.205698	0.235293
2019	0.0903094	0.0573013	0.0584887	0.0596726	0.0620306	0.080424	0.102122	0.141769	0.159975	0.177236	0.209934	0.24049
2020	0.0935898	0.0573013	0.0585298	0.0597547	0.0621936	0.0811952	0.103562	0.144306	0.162965	0.180628	0.21435	0.245862
2021	0.0970598	0.0573013	0.0585732	0.0598412	0.0623653	0.0820052	0.105069	0.146943	0.166064	0.184136	0.218895	0.251464
2022	0.100724	0.0573013	0.0586189	0.0599321	0.0625457	0.0828532	0.10664	0.149672	0.169263	0.187745	0.223763	0.257203
2023	0.104591	0.0573013	0.0586687	0.0600313	0.0627424	0.0837749	0.108339	0.152602	0.172686	0.191598	0.228933	0.263131
2024	0.108669	0.0573013	0.0587231	0.0601396	0.0629572	0.084777	0.110178	0.155749	0.17635	0.19571	0.234407	0.269299
2025	0.112963	0.0573013	0.0587825	0.060258	0.0631917	0.0858664	0.112167	0.159128	0.180271	0.200097	0.240188	0.275736
2026	0.117485	0.0573013	0.0588475	0.0603873	0.0634476	0.0870498	0.114317	0.162749	0.184461	0.204771	0.246279	0.282459
2027	0.122239	0.0573013	0.0589185	0.0605284	0.063727	0.0883348	0.116639	0.166627	0.188931	0.209743	0.252683	0.289311
2028	0.127235	0.0573013	0.0589961	0.0606827	0.0640319	0.0897294	0.119144	0.170772	0.193693	0.215022	0.259244	0.296363
2029	0.132481	0.0573013	0.0590808	0.0608512	0.0643648	0.0912421	0.121844	0.175198	0.198757	0.220619	0.266023	0.304005
2030	0.137986	0.0573013	0.0591736	0.0610354	0.0647283	0.0928823	0.124751	0.179914	0.204134	0.22654	0.273057	0.312131
2031	0.143757	0.0573013	0.0592751	0.061237	0.0651255	0.0946603	0.127878	0.184933	0.209831	0.232793	0.280371	0.320671
2032	0.149803	0.0573013	0.0593863	0.0614576	0.0655597	0.096587	0.131238	0.190265	0.215859	0.239384	0.287981	0.329578
2033	0.156132	0.0573013	0.0594997	0.0616855	0.06602	0.0986744	0.134846	0.195919	0.222222	0.246317	0.295894	0.338819
2034	0.162753	0.0573013	0.0596198	0.0619241	0.0664912	0.100936	0.138715	0.201904	0.228928	0.253594	0.304114	0.348368
2035	0.169672	0.0573013	0.0597492	0.0621812	0.0669985	0.103384	0.142859	0.20823	0.23598	0.261217	0.312642	0.357935
2036	0.176897	0.0573013	0.0598886	0.062458	0.0675443	0.105865	0.147294	0.214901	0.243382	0.269187	0.321475	0.367595
2037	0.184436	0.0573013	0.0600385	0.0627556	0.0681307	0.108478	0.152033	0.221924	0.251135	0.277499	0.330605	0.377821
2038	0.192294	0.0573013	0.0601995	0.0630751	0.06876	0.111267	0.157089	0.229302	0.259238	0.286151	0.340026	0.388473
2039	0.200478	0.0573013	0.0603574	0.0633937	0.0694079	0.11424	0.162477	0.237036	0.267688	0.295136	0.349727	0.399454
2040	0.208993	0.0573013	0.0605211	0.063719	0.0700499	0.117404	0.168208	0.245126	0.276481	0.304445	0.360142	0.410699
2041	0.217843	0.0573013	0.0606949	0.0640642	0.0707309	0.120765	0.173952	0.25357	0.28561	0.31407	0.371097	0.422156
2042	0.227032	0.0573013	0.0608795	0.0644307	0.0714531	0.124052	0.179973	0.262363	0.295065	0.323997	0.382467	0.434245
2043	0.236563	0.0573013	0.0610756	0.0648197	0.0722192	0.12745	0.186309	0.271497	0.304837	0.334213	0.39416	0.446389
2044	0.246437	0.0573013	0.0612837	0.0652326	0.0730316	0.131032	0.192965	0.280964	0.314911	0.344703	0.406111	0.458575
2045	0.256655	0.0573013	0.0615048	0.0656709	0.0738932	0.134804	0.199941	0.290751	0.325272	0.355449	0.418267	0.471262
2046	0.267217	0.0573013	0.0617395	0.0661361	0.0748069	0.138777	0.207241	0.300845	0.335906	0.366433	0.430684	0.484222
2047	0.27812	0.0573013	0.0619888	0.06663	0.0757758	0.142959	0.214347	0.311231	0.346792	0.377635	0.443265	0.497322
2048	0.289359	0.0573013	0.0622536	0.0671542	0.0768032	0.147359	0.22171	0.321891	0.357913	0.389035	0.455946	0.510545
2049	0.300931	0.0573013	0.0625349	0.0677106	0.0778926	0.151985	0.229385	0.332806	0.369247	0.400611	0.468686	0.523776
2050	0.312829	0.0573013	0.0628336	0.0683013	0.0790476	0.156847	0.237378	0.343956	0.380773	0.41284	0.481928	0.537411
2051	0.325045	0.0573013	0.0631509	0.0689284	0.0802721	0.161955	0.245694	0.355322	0.392471	0.42551	0.495438	0.550775
2052	0.337569	0.0573013	0.063488	0.069594	0.0815703	0.167317	0.254338	0.36688	0.404318	0.438476	0.508658	0.564349
2053	0.350386	0.0573013	0.0638461	0.0703006	0.0829464	0.172943	0.263313	0.378611	0.416293	0.451635	0.522127	0.577921
2054	0.363488	0.0573013	0.0642265	0.0710507	0.0844049	0.178842	0.272621	0.390491	0.428373	0.464909	0.535667	0.591411
2055	0.376857	0.0573013	0.0646307	0.071847	0.0859507	0.185022	0.282264	0.402499	0.440537	0.478738	0.549644	0.605157
2056	0.390477	0.0573013	0.0650601	0.0726923	0.0875889	0.191494	0.292242	0.414614	0.452765	0.492432	0.563344	0.618893
2057	0.404329	0.0573013	0.0655164	0.0735896	0.0893246	0.198264	0.302554	0.426815	0.465035	0.505991	0.577234	0.632426
2058	0.418394	0.0573013	0.0660012	0.0745421	0.0911636	0.205342	0.313197	0.439081	0.477819	0.5199	0.591552	0.645679
2059	0.432648	0.0573013	0.0665164	0.0755531	0.0931115	0.212735	0.324167	0.451393	0.490899	0.533932	0.60551	0.658992
2060	0.447072	0.0573013	0.0670638	0.0766261	0.0951746	0.22045	0.335459	0.463731	0.504131	0.548437	0.619532	0.67213
2061	0.461637	0.0573013	0.0676455	0.0777651	0.0973593	0.228494	0.347065	0.476078	0.517914	0.562653	0.633406	0.68494
2062	0.476323	0.0573013	0.0682636	0.0789738	0.0996723	0.236872	0.358913	0.488415	0.531955	0.577045	0.647403	0.697349
2063	0.491098	0.0573013	0.0689204	0.0802566	0.102121	0.24559	0.370964	0.500726	0.546565	0.59138	0.661215	0.7097
2064	0.505941	0.0573013	0.0696184	0.0816178	0.104711	0.254651	0.383201	0.512995	0.56095	0.605542	0.674649	0.721786
2065	0.520822	0.0573013	0.0703601	0.0830621	0.107452	0.264059	0.395608	0.525674	0.575547	0.61988	0.688015	0.733499
2066	0.535711	0.0573013	0.0711483	0.0845944	0.110352	0.273816	0.408172	0.538547	0.590103	0.634102	0.701064	0.744798
2067	0.550583	0.0573013	0.0719858	0.0862199	0.113417	0.283921	0.420878	0.551963	0.604485	0.648444	0.713666	0.75568
2068	0.565407	0.0573013	0.0728758	0.0879441	0.116658	0.294374	0.433632	0.565598	0.619039	0.662565	0.725775	0.766161
2069	0.580157	0.0573013	0.0738215	0.0897726	0.120082	0.305173	0.446385	0.579735	0.633027	0.676679	0.737398	0.776263
2070	0.594807	0.0573013	0.0748263	0.0917116	0.123698	0.316314	0.459121	0.594022	0.646941	0.690471	0.748563	0.786008
2071	0.609327	0.0573013	0.0758938	0.0937672	0.127517	0.327791	0.471824	0.608282	0.660593	0.703767	0.759304	0.795415
2072	0.623694	0.0573013	0.0770281	0.0959461	0.131547	0.339598	0.48448	0.6228	0.674287	0.7165	0.769654	0.804499
2073	0.637882	0.0573012	0.078233	0.0982553	0.135799	0.351725	0.497074	0.636808	0.687739	0.728673	0.77964	0.813273
2074	0.651868	0.0573012	0.0795129	0.100702	0.140282	0.364161	0.509595	0.650766	0.700775	0.740322	0.789284	0.821747
2075	0.665629	0.0573012	0.0808724	0.103294	0.145007	0.376891	0.522028	0.664471	0.713715	0.751493	0.798603	0.829928
2076	0.679145	0.0573012	0.0823163	0.106038	0.149983	0.389786	0.534363	0.678218	0.72632	0.76223	0.807609	0.837823
2077	0.692396	0.0573012	0.0838495	0.108943	0.155221	0.402823	0.546588	0.691712	0.738467	0.772571	0.816311	0.845438
2078	0.705366	0.0573012	0.0854776	0.112018	0.160732	0.415984	0.558694	0.704778	0.750114	0.782544	0.824717	0.852778
2079	0.718038	0.0573012	0.087206	0.115272	0.166526	0.429252	0.570671	0.717735	0.761266	0.792172	0.832834	0.859848
2080	0.730399	0.0573012	0.0890407	0.118712	0.172612	0.442614	0.582937	0.730343	0.77195	0.80147	0.840666	0.866653
